# Supplementary material for: Molecular size reforming of undersized and oversized polyoxymethylene dimethyl ethers
Source: Royal Society of Chemistry journal article supplement (doi:10.1039/c6ra08255f), 2016-01-01
Supplement: c6ra08255f1.pdf [file c6ra08255f1.pdf]

## Supporting information

### 1. Carbon balance data:

#### 1.1 Self-reforming of PODE<sub>1-2</sub> stream (Figure 3)

Table S-1 Carbon balance data in self-reforming of PODE<sub>1-2</sub> stream  
(Reaction temperature: 80 °C, NKC-9 catalyst loading: 5 wt%)

| Species                 | Reactor In |              | Reactor Out |        |
|-------------------------|------------|--------------|-------------|--------|
|                         | Mass (%)   | Carbon (wt%) | Mass (%)    | Carbon |
| PODE <sub>1</sub> (DMM) | 13.85      | 6.56         | 45.51       | 21.56  |
| PODE <sub>2</sub>       | 72.85      | 32.99        | 22.29       | 10.10  |
| PODE <sub>3</sub>       | 2.29       | 1.01         | 6.27        | 2.76   |
| PODE <sub>4</sub>       | 0.00       | 0.00         | 3.06        | 1.33   |
| PODE <sub>5</sub>       | 0.00       | 0.00         | 1.12        | 0.48   |
| PODE <sub>6</sub>       | 0.00       | 0.00         | 0.37        | 0.16   |
| PODE <sub>7</sub>       | 0.00       | 0.00         | 0.00        | 0.00   |
| PODE <sub>8</sub>       | 0.00       | 0.00         | 0.00        | 0.00   |
| Total FA                | 10.88      | 4.35         | 21.14       | 8.46   |
| Sum                     | 99.9       | 44.92        | 99.8        | 44.84  |

#### 1.2 Self-reforming of PODE<sub>n>4</sub> stream (Figure 4)

Table S-2 Carbon balance data in self-reforming of PODE<sub>n>4</sub> stream  
(Reaction temperature: 80 °C, NKC-9 catalyst loading: 5 wt%)

| Species                 | Reactor In |              | Reactor Out |        |
|-------------------------|------------|--------------|-------------|--------|
|                         | Mass (%)   | Carbon (wt%) | Mass (%)    | Carbon |
| PODE <sub>1</sub> (DMM) | 0.00       | 0.00         | 20.60       | 9.76   |
| PODE <sub>2</sub>       | 0.00       | 0.00         | 11.50       | 5.21   |
| PODE <sub>3</sub>       | 0.00       | 0.00         | 6.44        | 2.84   |
| PODE <sub>4</sub>       | 0.00       | 0.00         | 3.32        | 1.44   |
| PODE <sub>5</sub>       | 74.08      | 31.75        | 2.96        | 1.27   |
| PODE <sub>6</sub>       | 26.12      | 11.10        | 1.66        | 0.71   |
| PODE <sub>7</sub>       | 0.00       | 0.00         | 0.67        | 0.28   |

|                   |        |       |        |       |
|-------------------|--------|-------|--------|-------|
| PODE <sub>8</sub> | 0.00   | 0.00  | 0.30   | 0.13  |
| Total FA          | 0.00   | 0.00  | 52.95  | 21.18 |
| Sum               | 100.20 | 42.84 | 100.40 | 42.81 |

### 1.3 Reforming of PODE<sub>1-2</sub> stream by reacting with DMM (Figure 5)

Table S-3 Carbon balance data in reforming of PODE<sub>1-2</sub> stream by reacting with DMM  
( $M_{eq}=2:1$ , Reaction temperature: 80 °C, NKC-9 catalyst loading: 5 wt%)

| Species                 | Reactor In |              | Reactor Out |        |
|-------------------------|------------|--------------|-------------|--------|
|                         | Mass (%)   | Carbon (wt%) | Mass (%)    | Carbon |
| PODE <sub>1</sub> (DMM) | 56.38      | 26.71        | 57.16       | 27.08  |
| PODE <sub>2</sub>       | 36.80      | 16.67        | 26.92       | 12.19  |
| PODE <sub>3</sub>       | 1.16       | 0.51         | 8.61        | 3.80   |
| PODE <sub>4</sub>       | 0.00       | 0.00         | 3.76        | 1.63   |
| PODE <sub>5</sub>       | 0.00       | 0.00         | 1.41        | 0.60   |
| PODE <sub>6</sub>       | 0.00       | 0.00         | 0.43        | 0.18   |
| PODE <sub>7</sub>       | 0.00       | 0.00         | 0.00        | 0.00   |
| PODE <sub>8</sub>       | 0.00       | 0.00         | 0.00        | 0.00   |
| Total FA                | 5.56       | 2.22         | 3.56        | 0.76   |
| Sum                     | 99.90      | 46.11        | 101.85      | 46.25  |

### 1.4 Reforming of PODE<sub>1-2</sub> stream by reacting with DMM (Figure 6)

Table S-4 Carbon balance data in reforming of PODE<sub>n>4</sub> stream by reacting with DMM  
( $M_{eq}=2:1$ , Reaction temperature: 80 °C, NKC-9 catalyst loading: 5 wt%)

| Species                 | Reactor In |              | Reactor Out |        |
|-------------------------|------------|--------------|-------------|--------|
|                         | Mass (%)   | Carbon (wt%) | Mass (%)    | Carbon |
| PODE <sub>1</sub> (DMM) | 73.72      | 34.92        | 58.16       | 27.55  |
| PODE <sub>2</sub>       | 0.00       | 0.00         | 22.79       | 10.32  |
| PODE <sub>3</sub>       | 0.00       | 0.00         | 10.25       | 4.52   |
| PODE <sub>4</sub>       | 0.00       | 0.00         | 4.20        | 1.82   |
| PODE <sub>5</sub>       | 19.50      | 8.36         | 1.58        | 0.68   |
| PODE <sub>6</sub>       | 6.85       | 2.91         | 0.66        | 0.28   |

|                   |        |       |        |       |
|-------------------|--------|-------|--------|-------|
| PODE <sub>7</sub> | 0.00   | 0.00  | 0.27   | 0.11  |
| PODE <sub>8</sub> | 0.00   | 0.00  | 0.10   | 0.04  |
| Total FA          | 0.00   | 0.00  | 3.64   | 0.99  |
| Sum               | 100.07 | 46.19 | 101.65 | 46.32 |
